# Supplementary material for: Studies of the interaction of two organophosphonates with nanostructured silver surfaces
Source: Royal Society of Chemistry journal article supplement (doi:10.1039/c2an35641d), 2012-01-01
Supplement: c2an35641d.pdf [file c2an35641d.pdf]

# Studies of the interaction two organophosphonates with nanostructured silver surfaces

Farkhondeh Fathi<sup>a</sup>, François Lagugné-Labarhet<sup>\*b</sup>, David B. Pedersen<sup>c</sup>, Heinz-Bernhard  
Kraatz<sup>\*a</sup>

<sup>a</sup> Department of Physical and Environmental Sciences, University of Toronto,  
Scarborough, 1265 Military Trail, Toronto M1C 1A4, Canada. E-mail:  
bernie.kraatz@utoronto.ca.

<sup>b</sup> Department of Chemistry, Western University, 1151 Richmond Street, London,  
Ontario, N6A 5B7, Canada. E-mail: flagugne@uwo.ca

<sup>c</sup>Defence Research and Development Canada - Suffield, Box 4000, Stn Main, Medicine  
Hat, AB T1A 8K6 Canada.

**Supporting information**

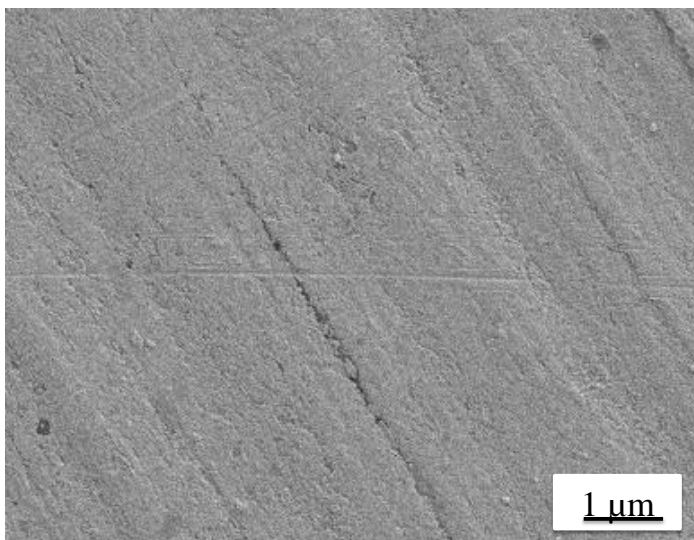

**Fig. S1** SEM images of the initial Ag foil.

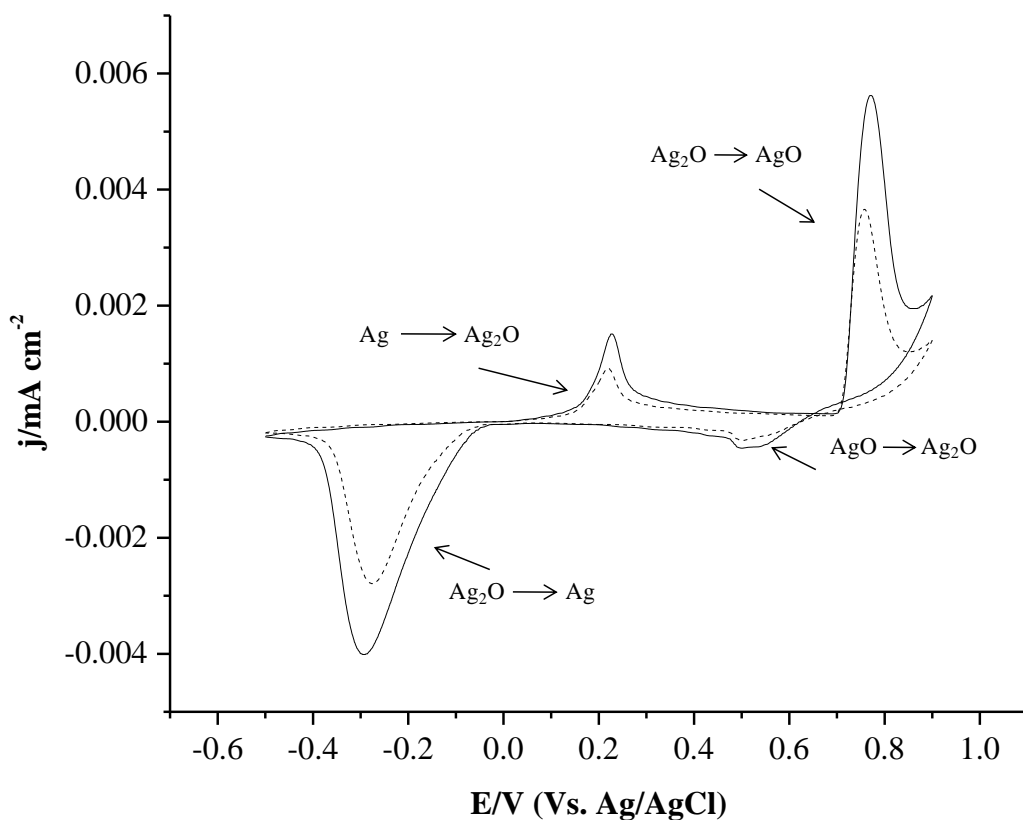

**Fig. S2** Effects of paraoxon addition on the cyclic voltammograms of gas-phase generated Ag NPs on ITO. The overlay of the cyclic voltammograms for Ag NPs-decorated ITO in 8.0 M KOH (—) and after addition of 10 mM paraoxon in 8 M KOH (---).

(.....). The intensity of all redox signals in the presence of paraoxon decreases significantly. CVs were recorded at a scan rate of  $0.15 \text{ Vs}^{-1}$  in the potential range of  $-0.5$  and  $0.9 \text{ V}$  vs.  $\text{Ag}/\text{AgCl}$  after 15 CV scans.

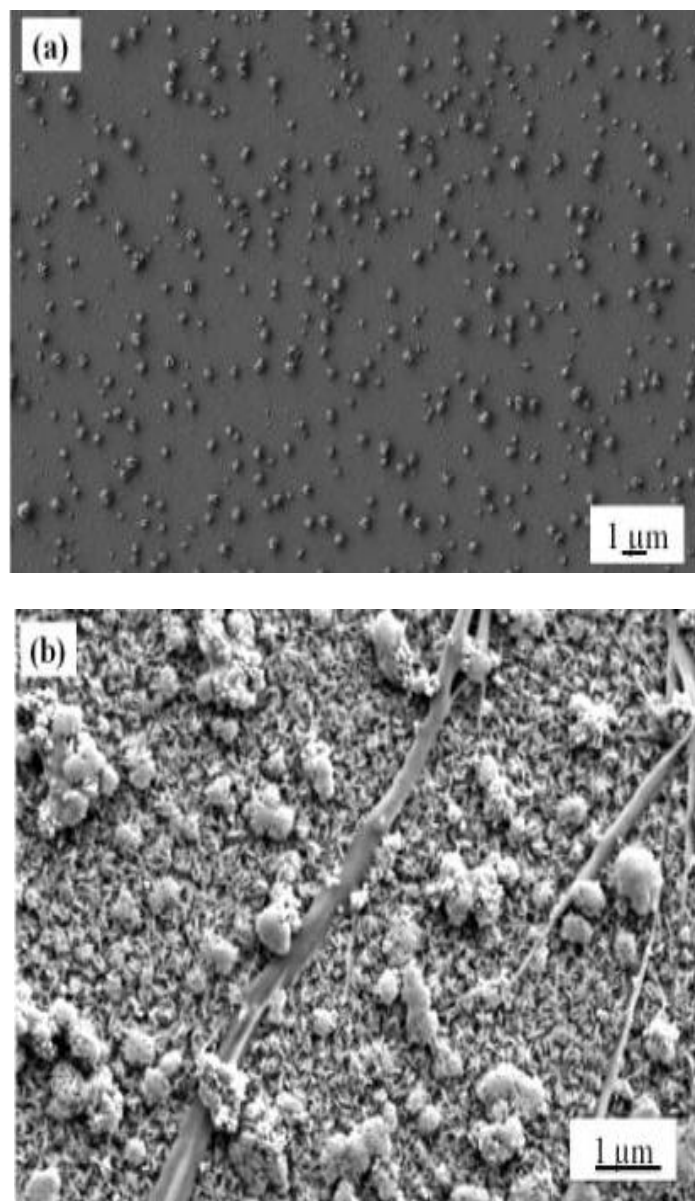

**Fig. S3** SEM images of the Ag NPs decorated ITO cycled in (a) 8 M KOH, (b) 10 mM Paraoxon in 8 M KOH. Images were recorded after a total of 15 electrochemical cycles in

the range of -0.5 and 0.9 V vs. Ag/AgCl at a scan rate of 150 mV. Aggregation of Ag particles and the formation of additional needle-like structures are observed.

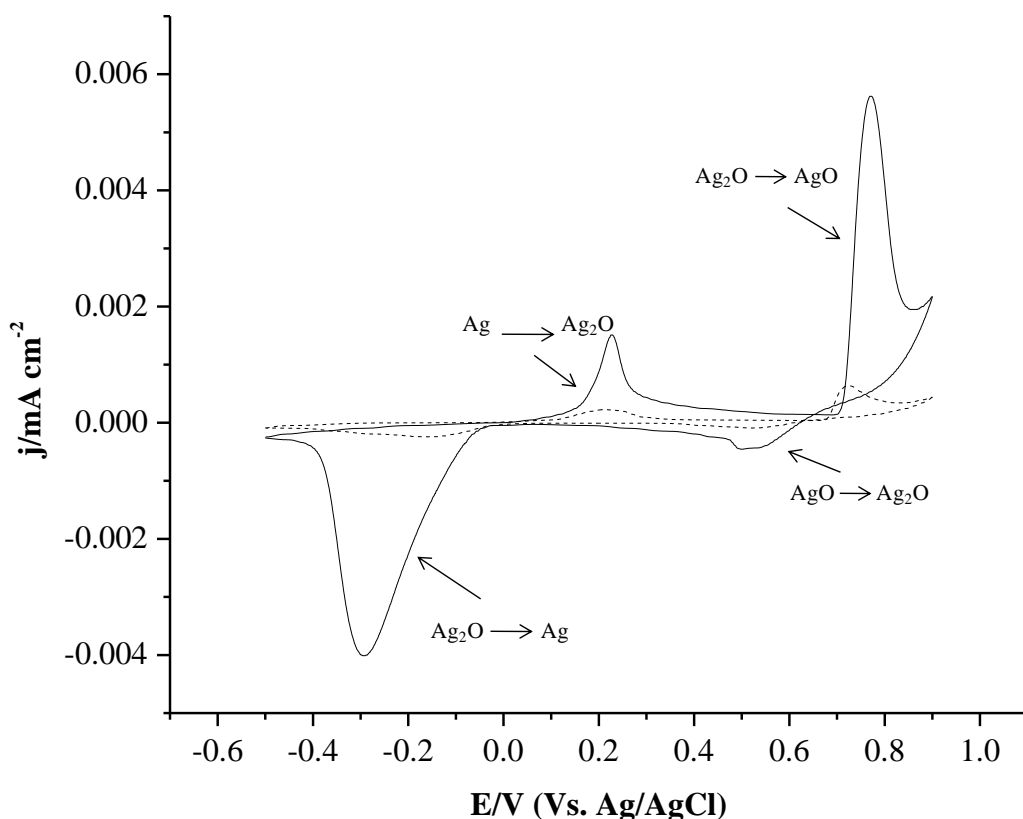

**Fig. S4** Effects of malathion addition on the cyclic voltammograms of gas-phase generated Ag NPs on ITO. The overlay of the cyclic voltammograms for Ag NPs-decorated ITO in 8.0 M KOH (—) and after addition of 10 mM malathion in 8 M KOH (·····). CVs were recorded at a scan rate of 0.15 Vs<sup>-1</sup> in the potential range of -0.5 and 0.9 V vs. Ag/AgCl after 15 CV scans. The intensity of all electrochemical signals decreased significantly. In addition, shifts in the redox signals were observed with the exception of that of the Ag(0) → Ag(I) oxidation wave.

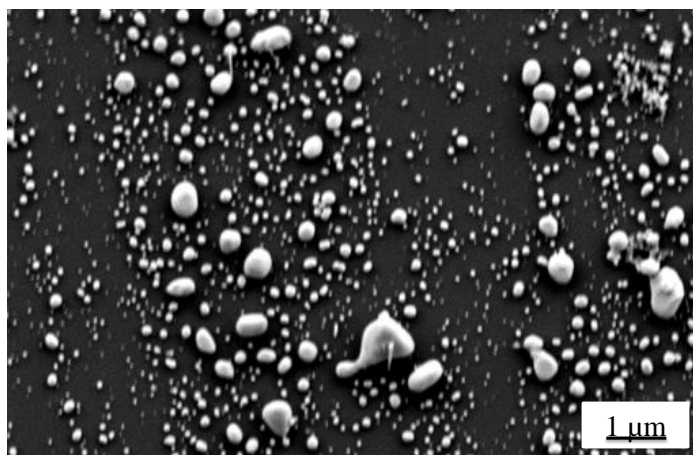

**Fig. S5** SEM image of the Ag NPs decorated ITO cycled in 10 mM malathion in 8 M KOH. image was recorded after a total of 15 electrochemical cycles in the range of -0.5 and 0.9 V vs. Ag/AgCl at a scan rate of 150 mV. Interestingly, the surface morphology of the Ag NP-decorated ITO after exposure to malathion is more spherical with an average size of 81 nm.

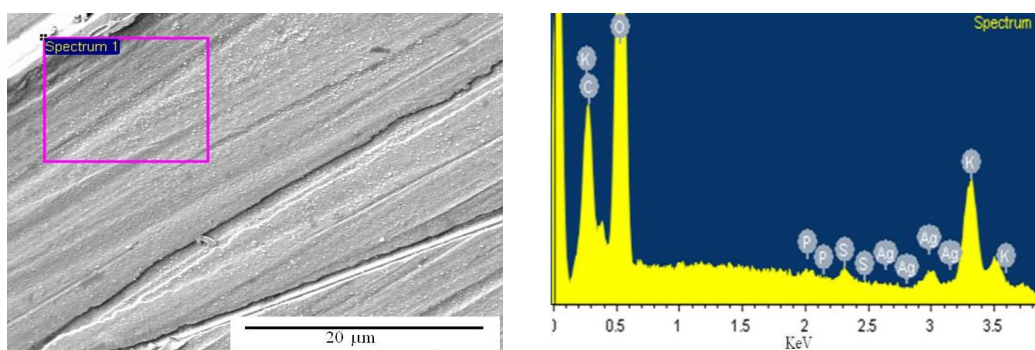

**Fig. S6** EDX analysis from the Ag foil cycled in 10 mM Malathion in 8 M KOH. Images were recorded after a total of 15 electrochemical cycles in the range of -0.5 and 0.9 V vs. Ag/AgCl at a scan rate of 150 mV. The results show the composition of Sulphur (1.66 %), phosphorus (0.68%), O (61.57%), C (15.69%), K (19.11% ) and Ag (1.84%).

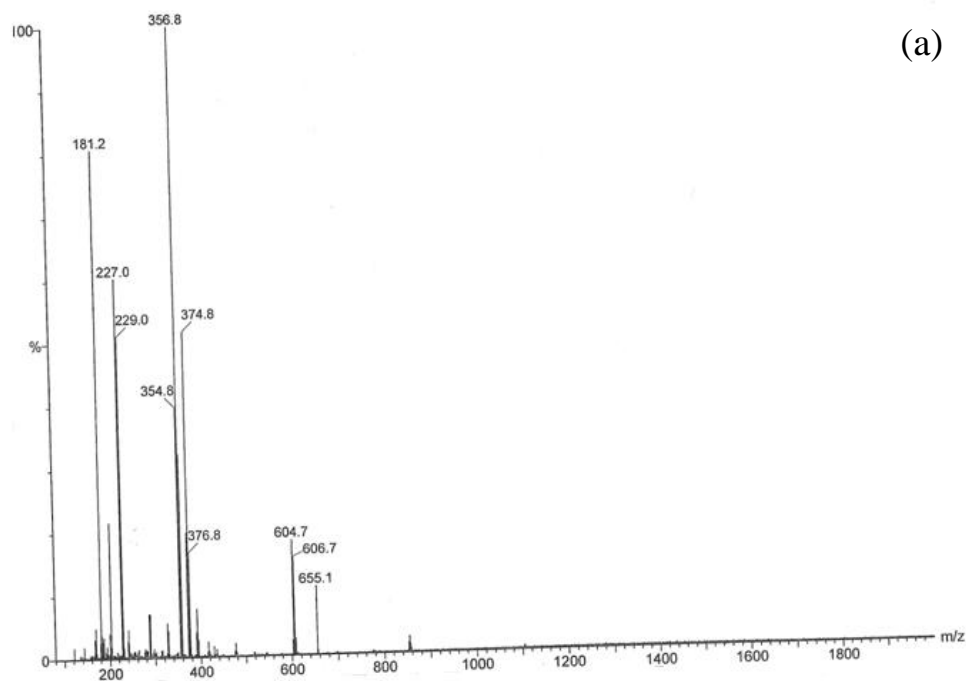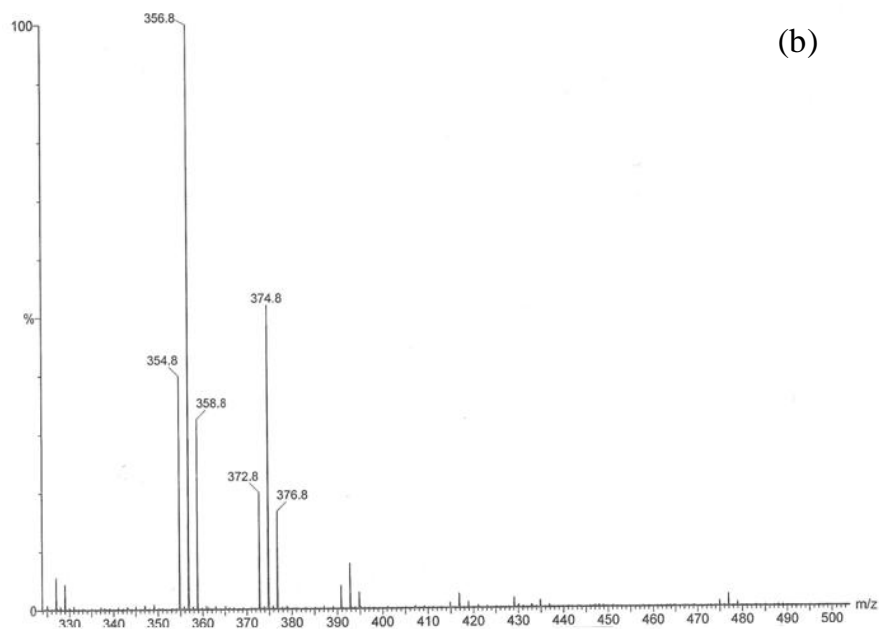

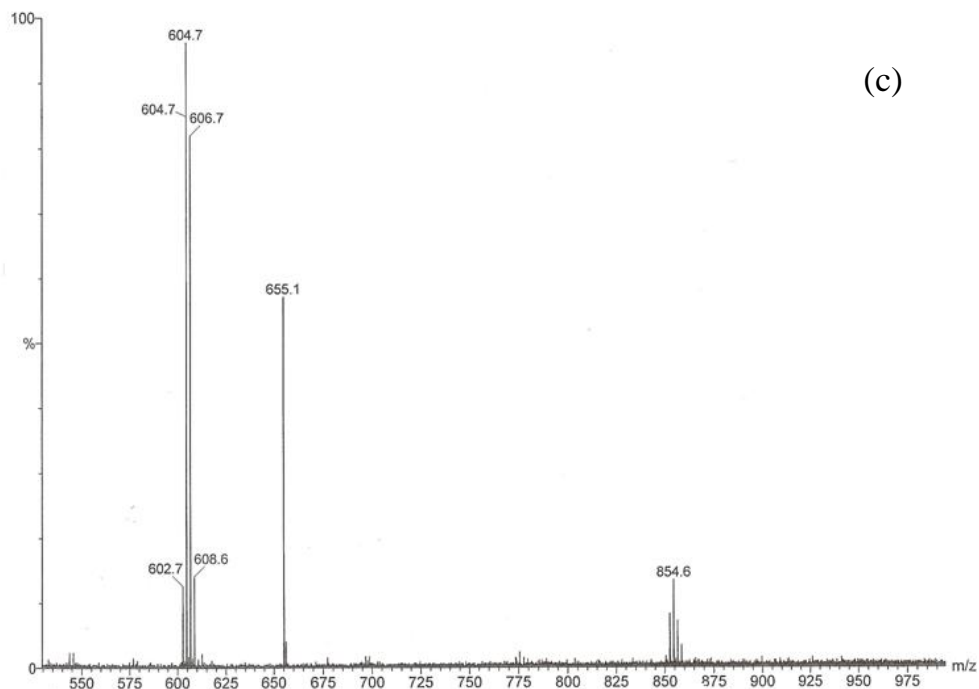

**Fig. S7** electrospray mass spectroscopy in positive mode of  $\text{AgNO}_3$  with malathion in water. (b) and (c) are the expansion of (a) spectrum. The 227 and 229 peaks show the presence of  $\text{AgSPO}_2\text{H}$ . The 354.8, 356.8 and 358.8 peaks show the presence of  $\text{Ag}_2\text{OSP}(\text{CH}_3\text{O})_2$ . The 372.8, 374.8 and 376.8 peaks show the presence of  $\text{Ag}_2\text{OSP}(\text{CH}_3\text{O})_2$  and  $\text{H}_2\text{O}$ . The 602.7, 604.7, 606.7 and 608.6 peaks show the presence of  $\text{Ag}_3(\text{OSP}(\text{CH}_3\text{O})_2)_2$ . The proposed complexation structures of these multinuclear Ag structures have been shown in scheme 3.

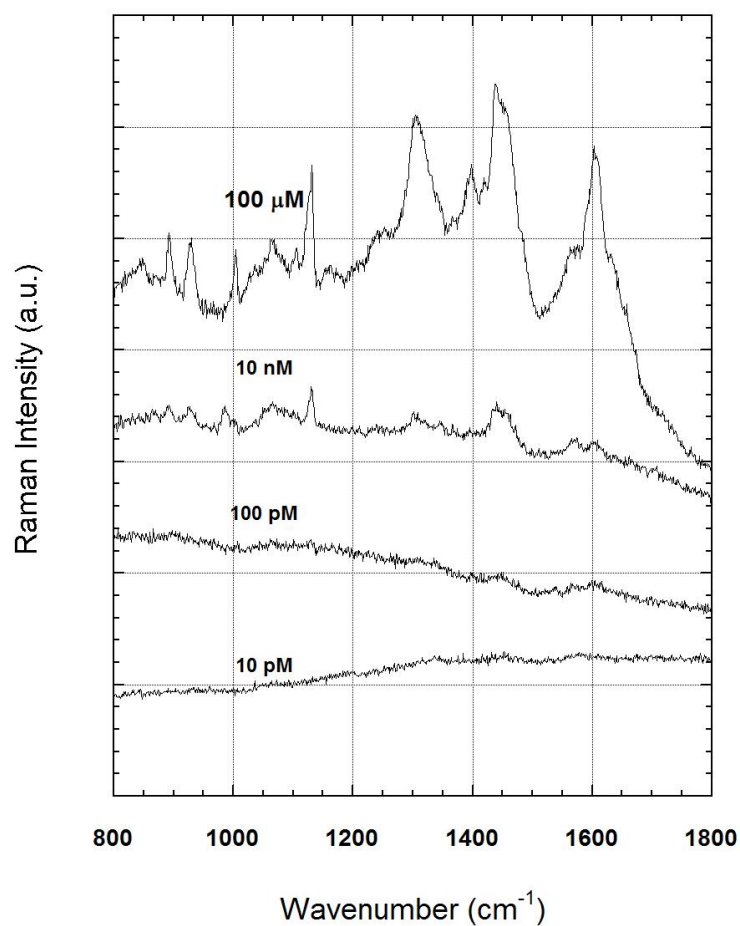

**Fig. S8** SERS spectrum of the Ag foil surface cycled in a wide range of paraoxon concentration (1 mM- 1 pM) in 8 M KOH. Spectra were recorded after a total of 15 electrochemical cycles in the range of -0.5 and 0.9 V vs. Ag/AgCl at a scan rate of 150 mV. These spectra series show a limit of detection of 10 nM for paraoxon.
